# Supplementary material
Source: PubMed Central journal article supplement (PMC8697753)
Supplement: NIHMS1741428-supplement-Source_data_original_WB_Extended_data_Fig__8.pdf [file NIHMS1741428-supplement-Source_data_original_WB_Extended_data_Fig__8.pdf]

# Extended Data Figure 8b

**b**

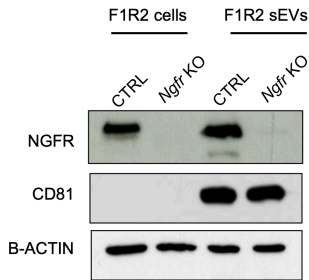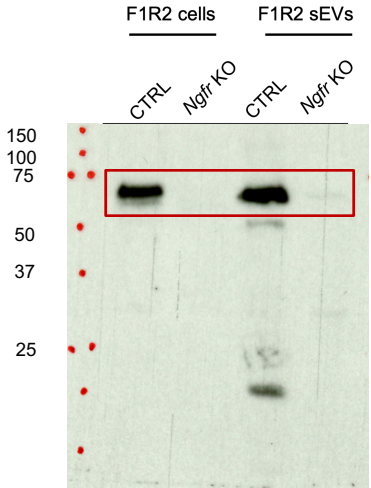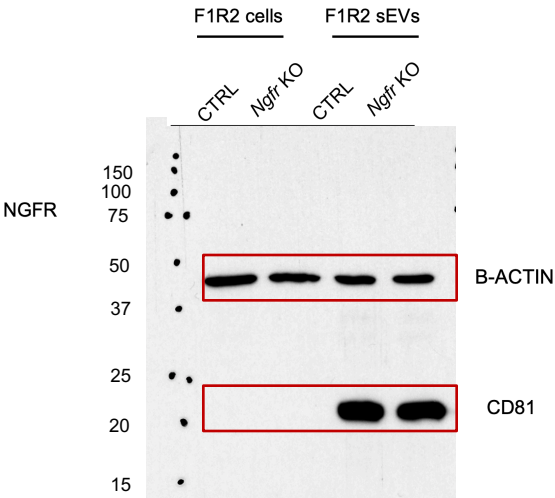

# Extended Data Figure 8f

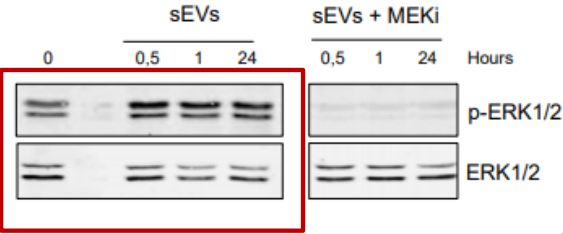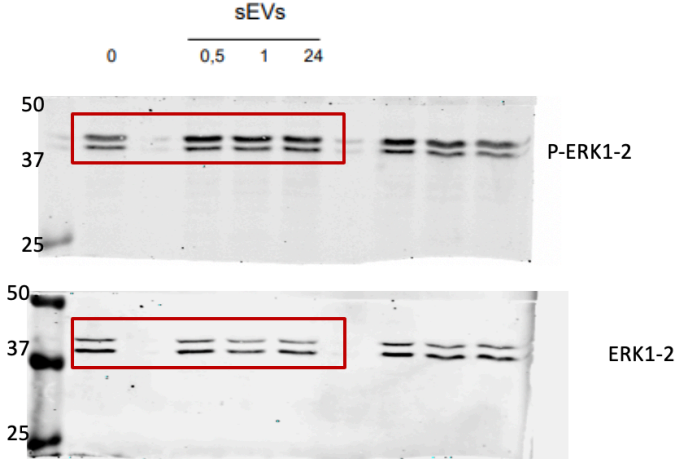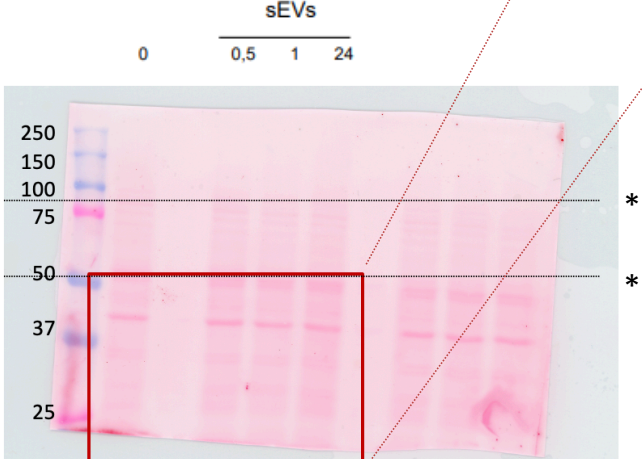

\* Membrane was cut where indicated and incubated with antibodies
