# Supplementary material
Source: PubMed Central journal article supplement (PMC8697753)

# Extended Data Figure 1a

**a**

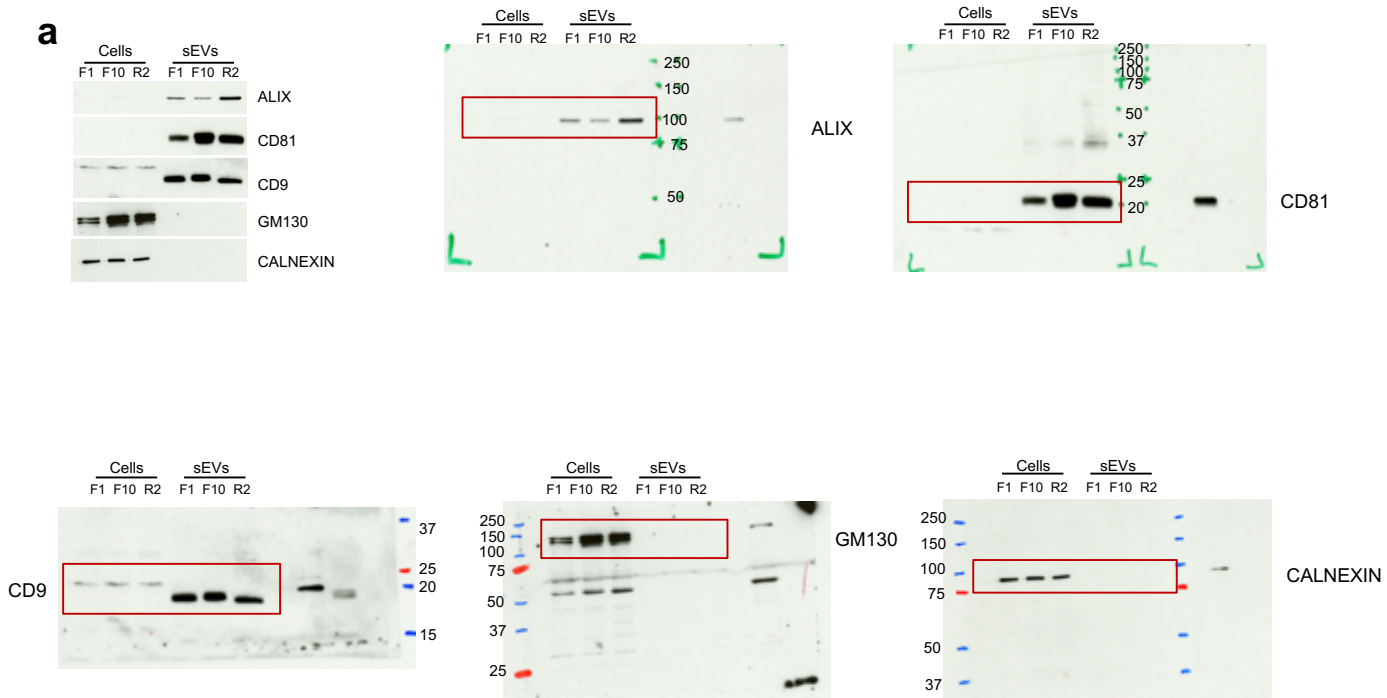

# Extended Data Figure 1c

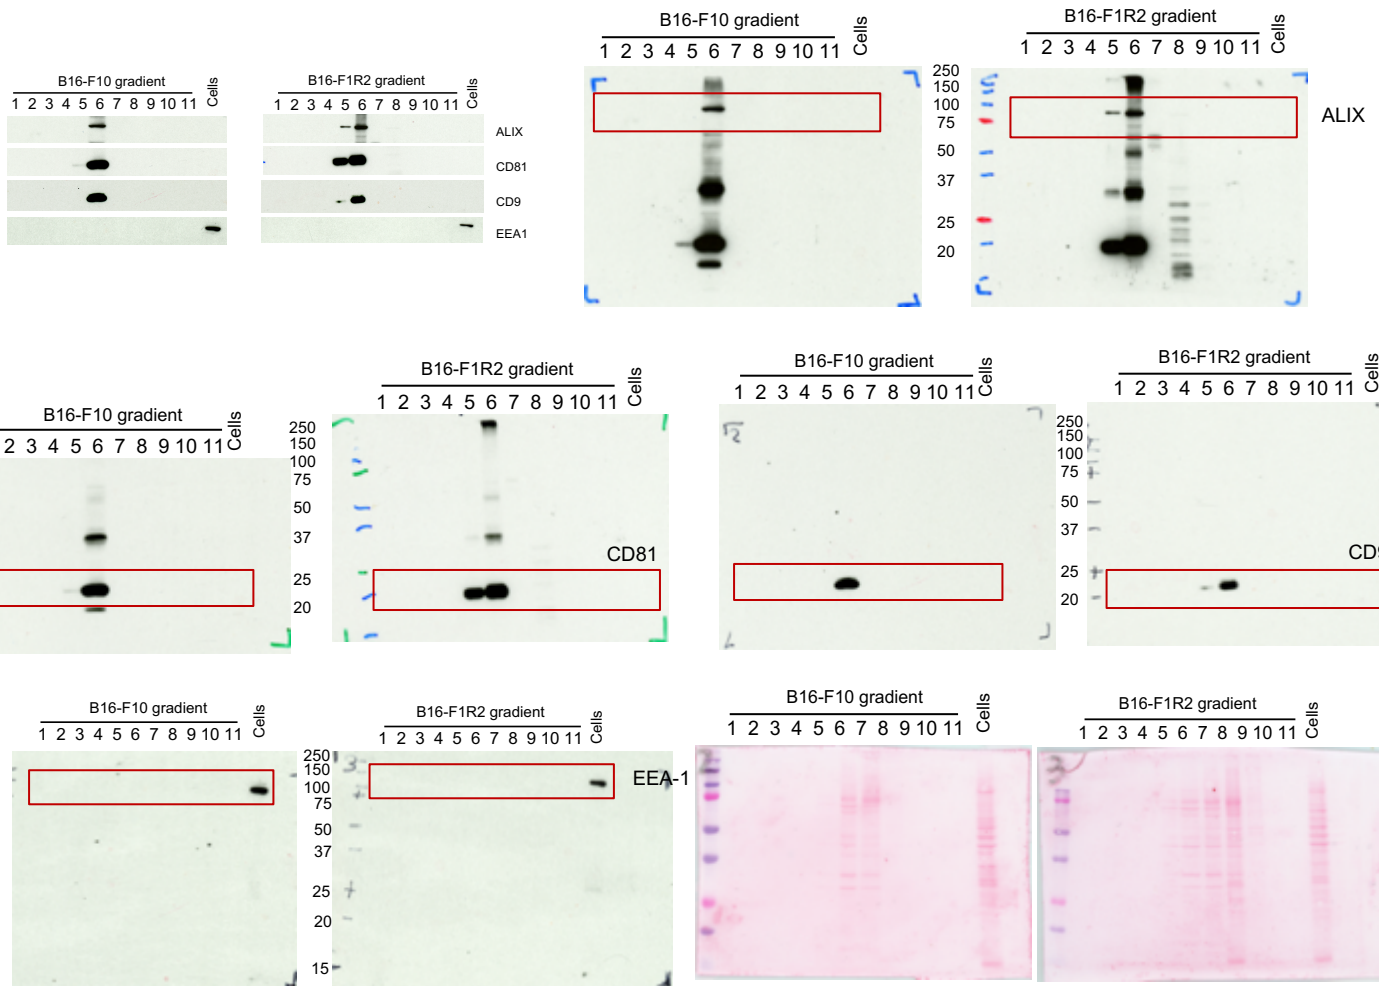

Supplement: NIHMS1741428-supplement-Source_data_original_WB_Extended_data_Fig__1.pdf [file NIHMS1741428-supplement-Source_data_original_WB_Extended_data_Fig__1.pdf]

# Extended Data Figure 3c

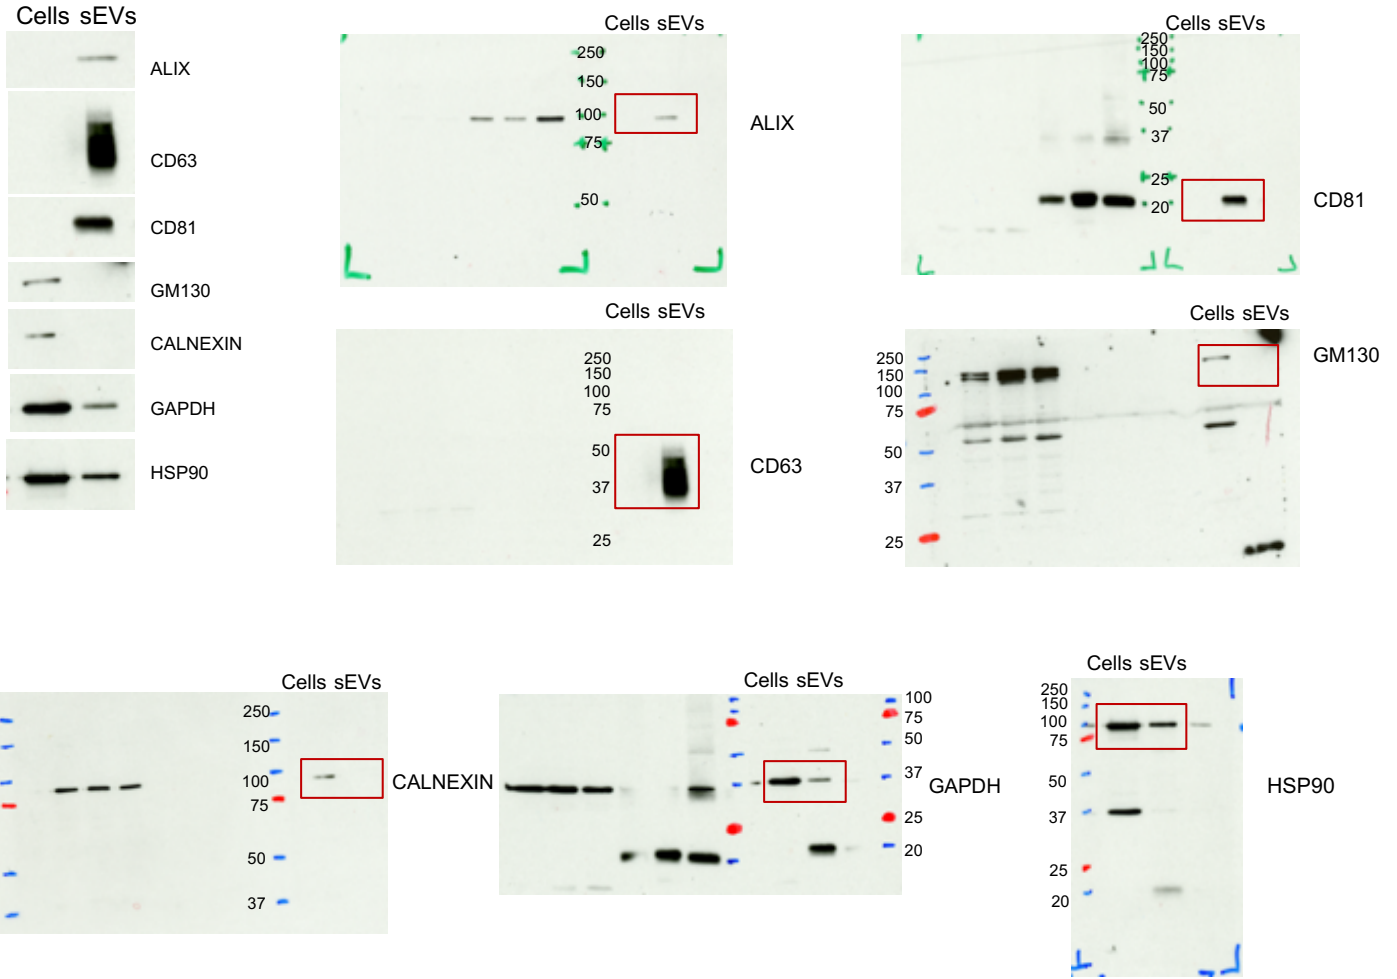

# Extended Data Figure 3d

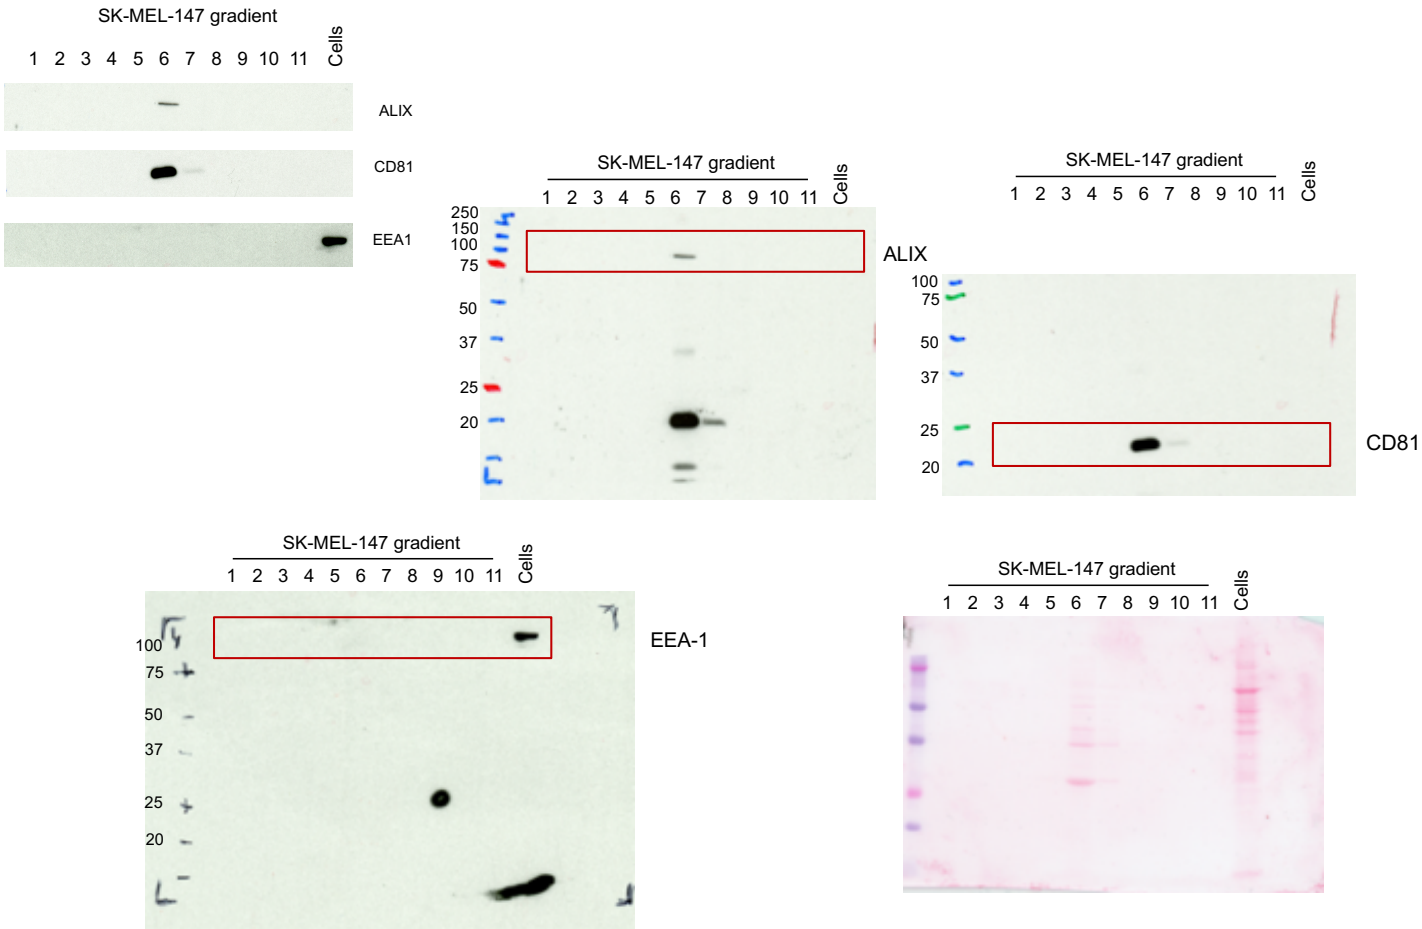

Supplement: NIHMS1741428-supplement-Source_data_original_WB_Extended_data_Fig__3.pdf [file NIHMS1741428-supplement-Source_data_original_WB_Extended_data_Fig__3.pdf]

# Extended Data Figure 9c

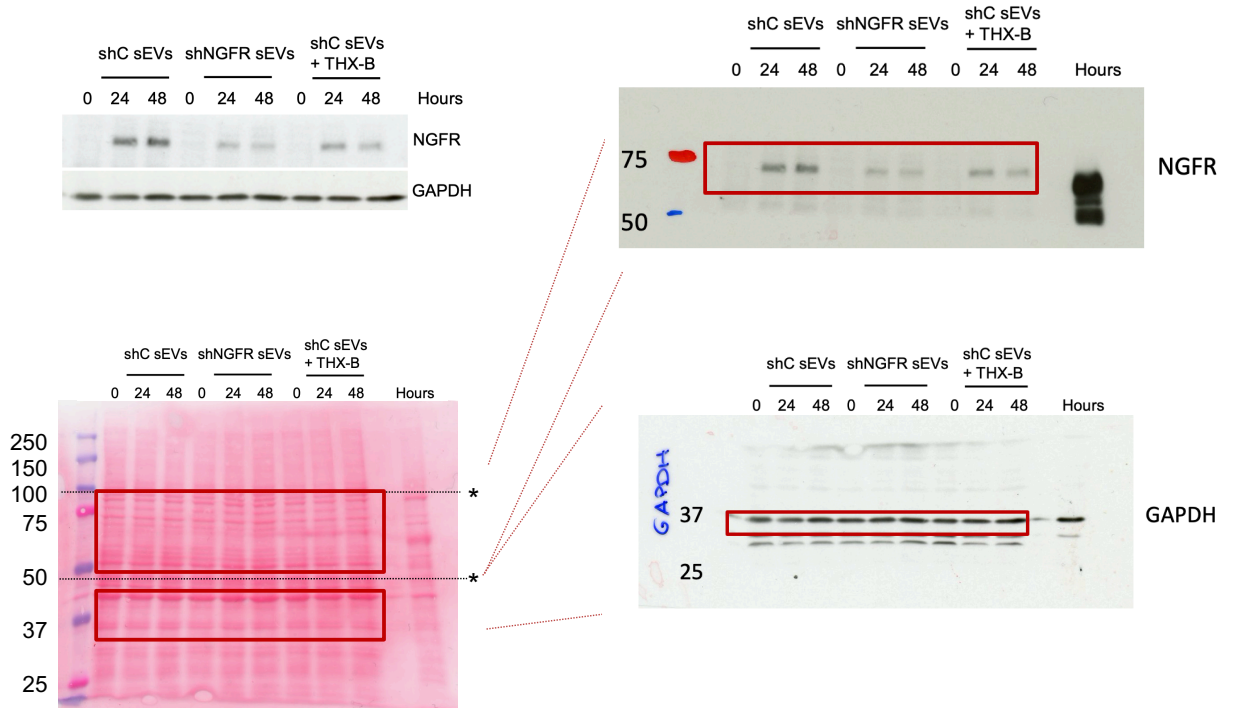

\* Membrane was cut where indicated and incubated with antibodies

Supplement: NIHMS1741428-supplement-Source_data_original_WB_Extended_data_Fig__9.pdf [file NIHMS1741428-supplement-Source_data_original_WB_Extended_data_Fig__9.pdf]

**Figure 4c**

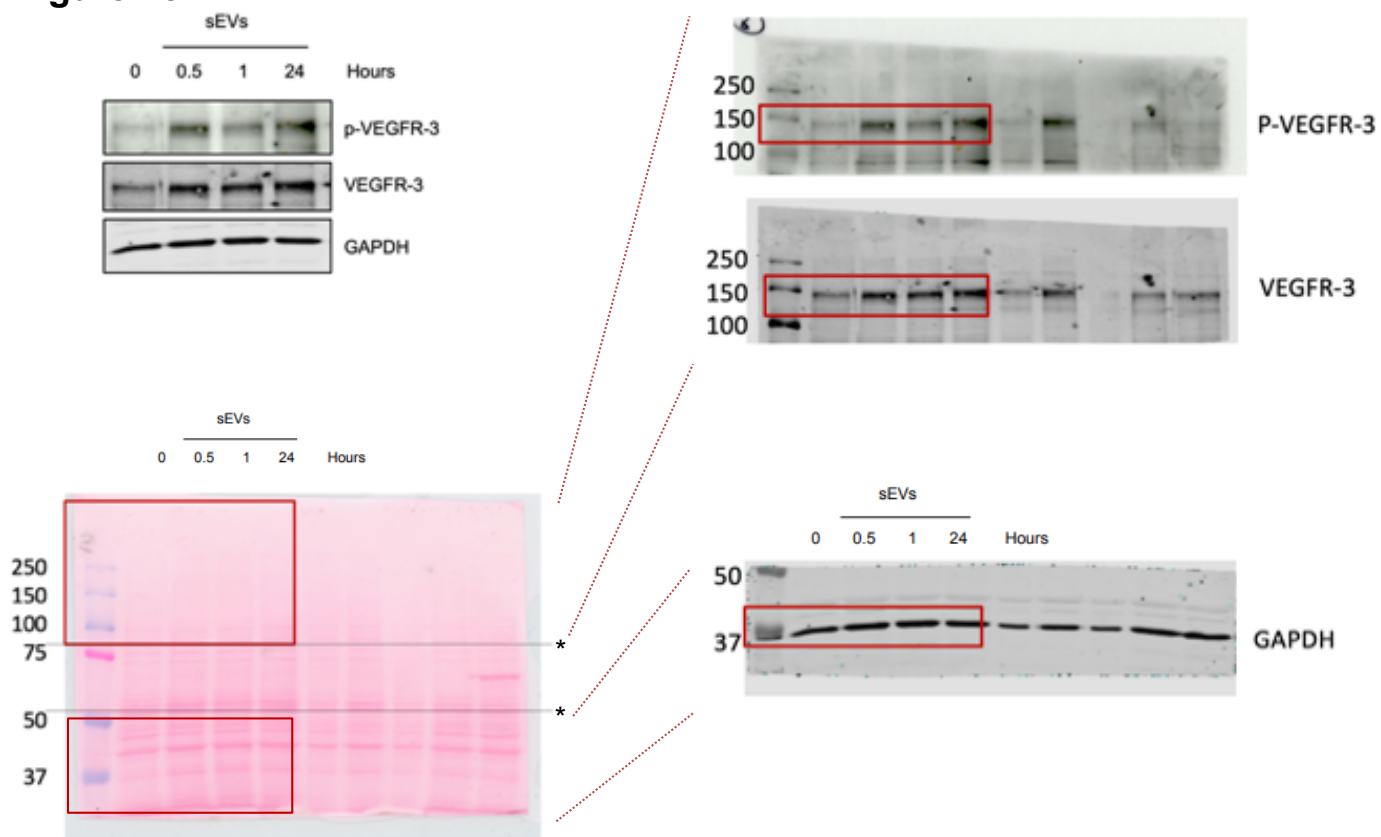

\* Membrane was cut where indicated and incubated with antibodies

Supplement: NIHMS1741428-supplement-Source_data_original_WB_Fig__4c.pdf [file NIHMS1741428-supplement-Source_data_original_WB_Fig__4c.pdf]

Figure 5a

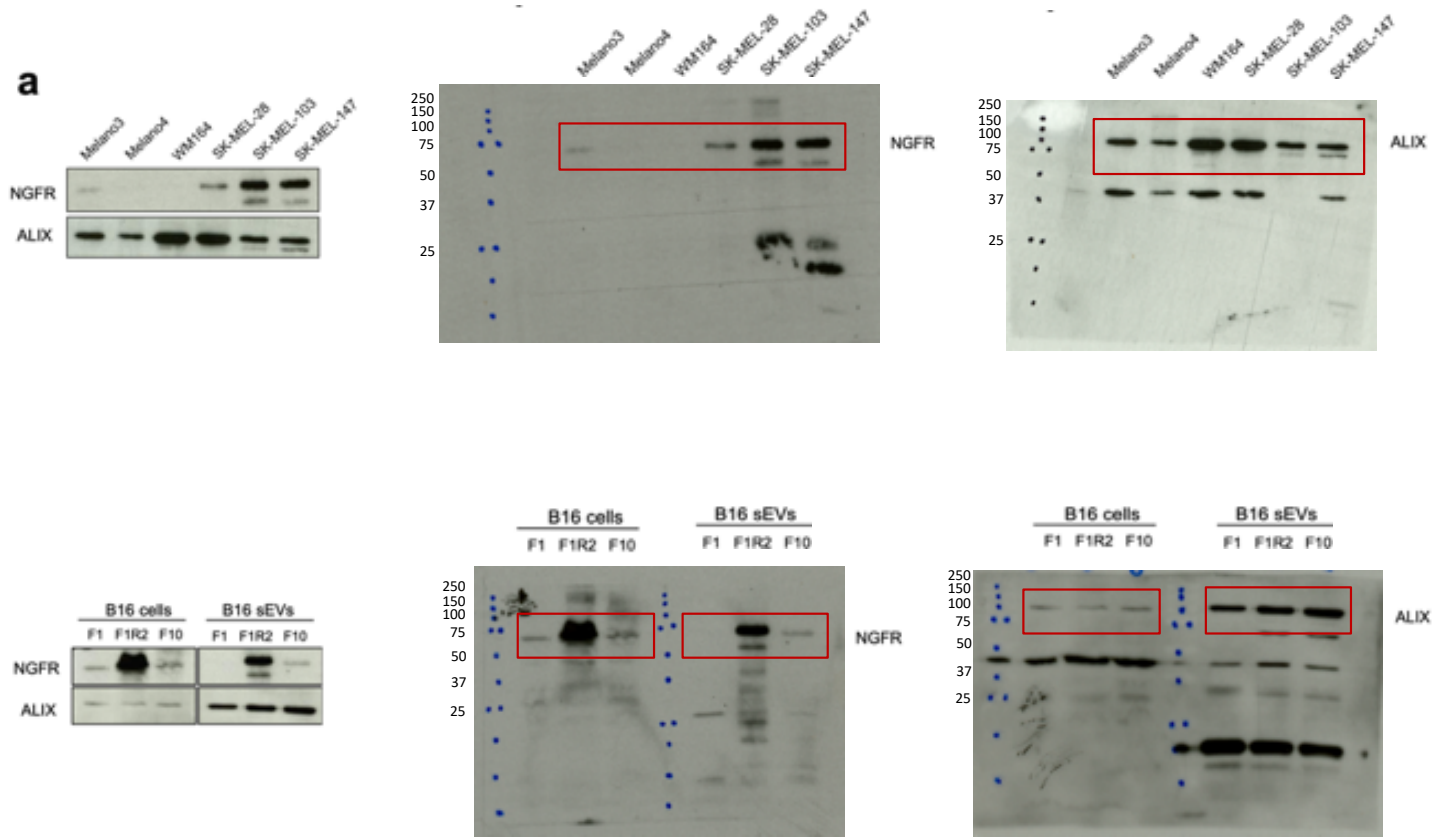

Supplement: NIHMS1741428-supplement-Source_data_original_WB_Fig__5a.pdf [file NIHMS1741428-supplement-Source_data_original_WB_Fig__5a.pdf]

# Figure 6h

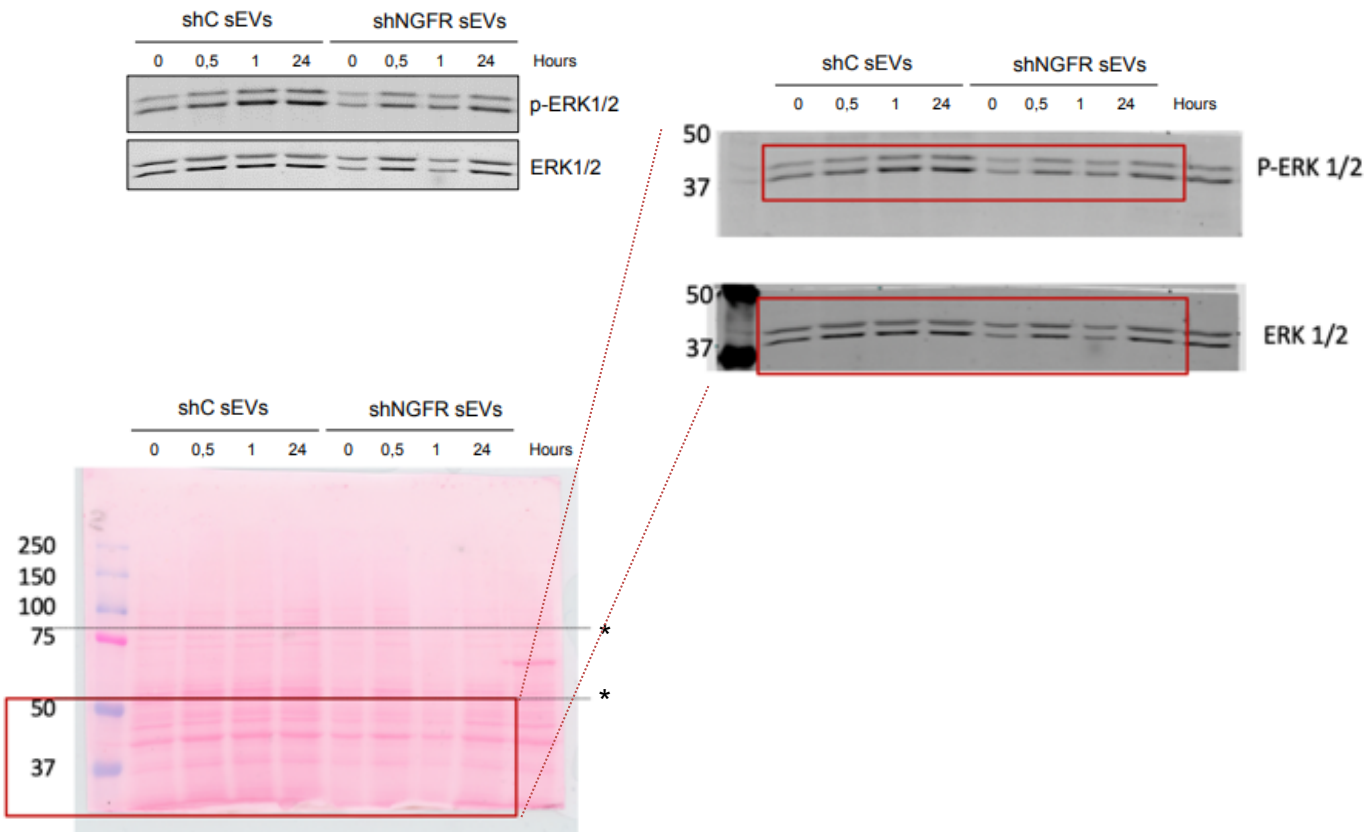

\* Membrane was cut where indicated and incubated with antibodies

Supplement: NIHMS1741428-supplement-Source_data_original_WB_Fig__6h.pdf [file NIHMS1741428-supplement-Source_data_original_WB_Fig__6h.pdf]
